# Supplementary material for: Vulnerable top-of-permafrost ground ice indicated by remotelysensed late-season subsidence
Source: Copernicus journal article supplement (doi:10.5194/tc-2020-312), 2020-10-30
Supplement: Supplementary file 1 [file tc-2020-312-supplement.pdf]

## Supplement to: Vulnerable top-of-permafrost ground ice indicated by remotely sensed late-season subsidence

Table S1: Cores from 2015

| Name   | Lat/lon [°]     | Ice rich | Description                                           |
|--------|-----------------|----------|-------------------------------------------------------|
| 05-1/2 | 67.786/-164.474 | 1        | 2 cores: massive ice; silt with up to 40% visible ice |
| 05-3   | 67.811/-164.563 | 1        | silt with 40% visible ice                             |
| 05-4   | 67.816/-164.598 | 1        | massive ice                                           |
| 05-5   | 67.821/-164.592 | 1        | massive ice and ice-rich silt (30% visible ice)       |
| 05-6   | 67.823/-164.609 | 1        | ice inclusions in peat and massive ice                |
| 05-7   | 67.845/-164.735 | 0        | gravel with 5% visible ice                            |
| 05-8   | 67.849/-164.726 | 1        | silt with 30 to 40% visible ice                       |
| 05-9   | 67.847/-164.731 | 1        | silt and gravel: 50% visible ice                      |
| 05-10  | 67.843/-164.740 | 1        | silt 30% visible ice (lenses up to 5 mm thick)        |
| 05-11  | 67.845/-164.725 | 1        | ice with soil inclusions: 50 to 60% visible ice       |
| 05-12  | 67.847/-164.721 | 1        | gravelly silt with 40 to 50% visible ice              |
| 05-13  | 67.851/-164.732 | 1        | silt with 40% visible ice                             |
| 05-14  | 67.849/-164.737 | 1        | ice with silt inclusions: 50 to 60% visible ice       |

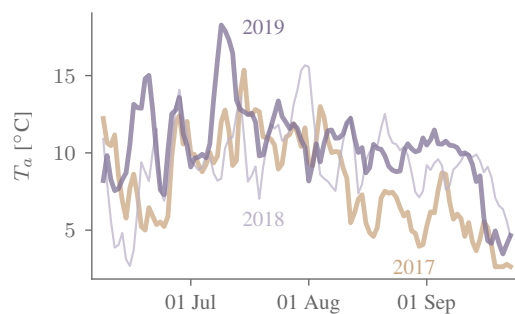

Figure S1: Air temperature  $T_a$  time series for Kivalina from the MERRA-2 reanalysis.
